# Supplementary material for: Optimized Bioproduction of Itaconic and Fumaric Acids Based on Solid-State Fermentation of Lignocellulosic Biomass
Source: PubMed Central journal article supplement (PMC7179149; doi:10.3390/molecules25051070), 2020-02-27
Supplement: molecules-25-01070-s001.pdf [file molecules-25-01070-s001.pdf]

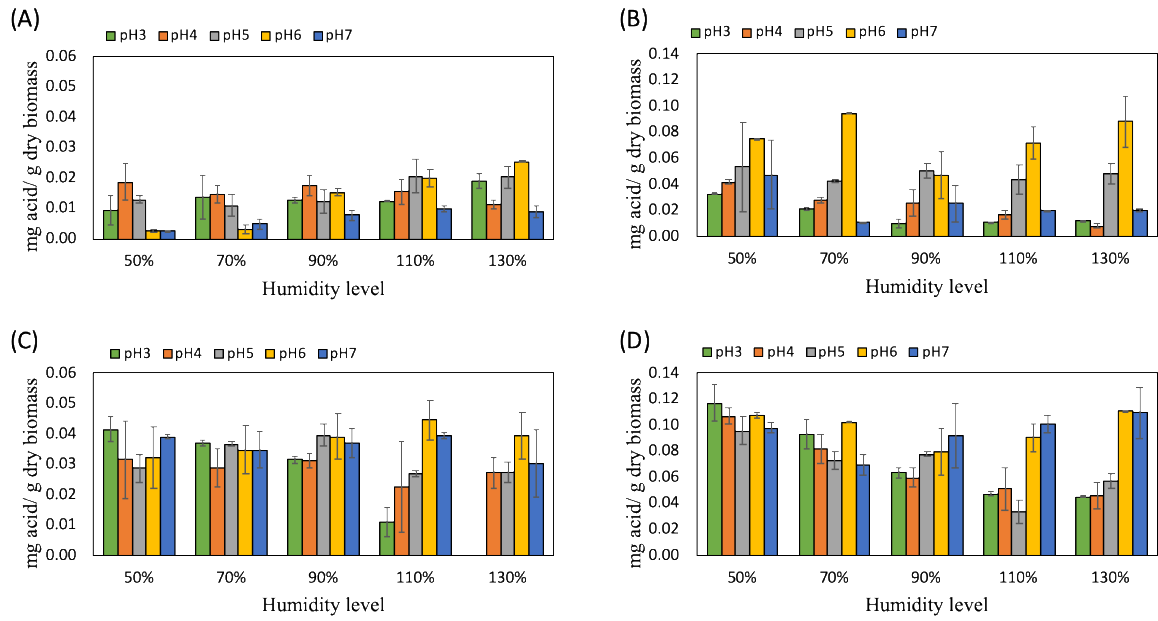

**Figure S1.** SSF on corn cobs at different pH and moisture levels by *A. terreus* (IA and FA yields: **A** and **B**, respectively) and *A. oryzae* (**C** and **D**, respectively).

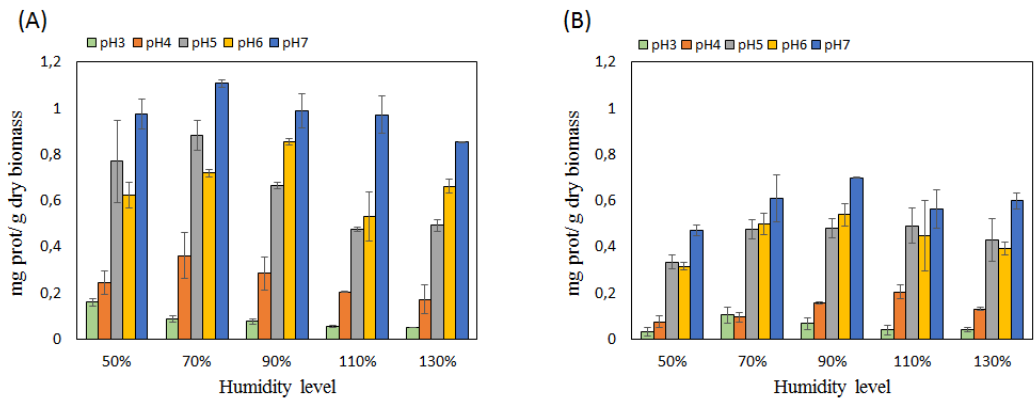

**Figure S2.** Fungal growth (proteins productions) under different pH and moisture conditions. **(A)** SSF of corn cobs by *A. terreus* and **(B)** SSF of corn cobs by *A. oryzae*.
